# Supplementary material
Source: PubMed Central journal article supplement (PMC4120204)
Supplement: NIHMS588737-supplement-01.pdf [file NIHMS588737-supplement-01.pdf]

**Elucidation of the specific function of the conserved threonine triad responsible for human L-asparaginase autocleavage and substrate hydrolysis\***Julian Nomme, Ying Su and Arnon Lavie<sup>‡</sup>

From the Department of Biochemistry and Molecular Genetics, University of Illinois at Chicago, Chicago, USA.

**SUPPLEMENTARY Table S1.**

| Entry | Resolution  | Wilson ratio<br>$\langle I^2 \rangle / \langle I \rangle^2$ |                                     | L-test on<br>acentric<br>data | H-test on<br>acentric<br>data | R vs R        |
|-------|-------------|-------------------------------------------------------------|-------------------------------------|-------------------------------|-------------------------------|---------------|
|       |             | Acentric<br>reflections <sup>a</sup>                        | Centric<br>reflections <sup>b</sup> | Mean  L  <sup>c</sup>         | mean  H  <sup>d</sup>         | Observed/Calc |
| 4O0C  | Full range  | 1.868                                                       | 2.207                               | 0.450                         | 0.048                         | 0.056/0.292   |
|       | 2.80-1.60 Å | 1.755                                                       | 2.028                               | 0.418                         | 0.071                         | 0.083/0.348   |
| 4O0D  | Full range  | 1.893                                                       | 2.430                               | 0.424                         | 0.024                         | 0.029/0.320   |
|       | 2.90-2.05 Å | 1.809                                                       | 2.038                               | 0.416                         | 0.037                         | 0.045/0.397   |
| 4O0E  | Full range  | 1.741                                                       | 1.663                               | 0.413                         | 0.043                         | 0.052/0.300   |
|       | 2.40-1.81 Å | 2.160                                                       | 1.691                               | 0.384                         | 0.056                         | 0.068/0.391   |
| 4O0F  | Full range  | 1.982                                                       | 2.408                               | 0.468                         | 0.026                         | 0.033/0.279   |
|       | 3.20-2.01 Å | 1.964                                                       | 1.704                               | 0.425                         | 0.037                         | 0.046/0.339   |
| 4O0G  | Full range  | 1.967                                                       | 1.954                               | 0.477                         | 0.030                         | 0.039/0.302   |
|       | 3.60-2.20 Å | 1.857                                                       | 1.571                               | 0.412                         | 0.040                         | 0.053/0.324   |
| 4O0H  | Full range  | 2.057                                                       | 2.564                               | 0.484                         | 0.041                         | 0.051/0.288   |
|       | 3.60-2.10 Å | 1.970                                                       | 1.285                               | 0.438                         | 0.043                         | 0.053/0.285   |

<sup>a</sup>Acentric reflections: untwinned: 2.000; perfect twin; 1.500<sup>b</sup>Centric reflections: untwinned: 3.000; perfect twin; 2.000<sup>c</sup>L-test for acentric data: untwinned: 0.500; perfect twin; 0.375<sup>d</sup>H-test on acentric data: untwinned: 0.50 ; perfect twin; 0.0**Table S1.** Twinning analysis using phenix.xtriage.
